# Supplementary material for: Plasticity of lung development in the amphibian, Xenopus laevis
Source: PubMed Central journal article supplement (PMC3863417; doi:10.1242/bio.20133772), 2013-10-16
Supplement: supp_bio.20133772_bio.20133772-s1.pdf [file supp_bio.20133772_bio.20133772-s1.pdf]

**Supplementary Material**

Christopher S. Rose and Brandon James doi: 10.1242/bio.20133772

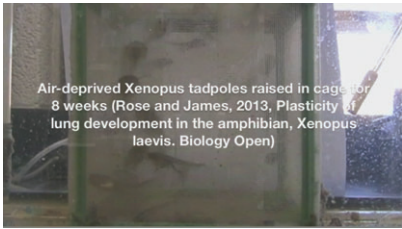

**Movie 1.** A 10-second clip of air-deprived *Xenopus* tadpoles, metamorphs and frogs that have been raised in a cage for 8 weeks. The aeration has been turned off to eliminate bubbles.

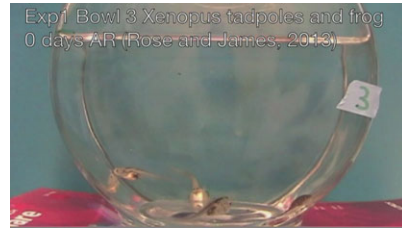

**Movie 5.** A second 10-second clip of tadpoles and frog in Experiment 1 Bowl 3 that have been air-restored (AR) for 0 days, showing swimming and breathing behaviors.

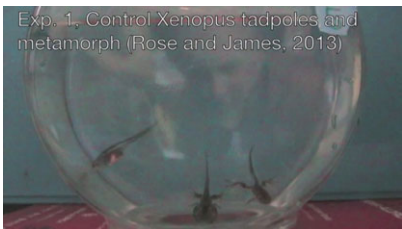

**Movie 2.** A 10-second clip of untreated (control) tadpoles and metamorphs in Experiment 1 showing swimming and breathing behaviors.

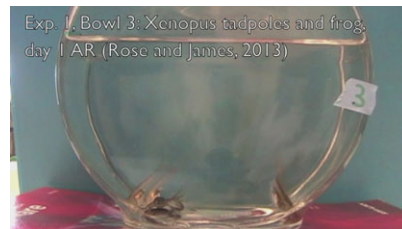

**Movie 6.** A 10-second clip of tadpoles and frog in Experiment 1 Bowl 3 that have been air-restored (AR) for 1 day, showing swimming and breathing behaviors.

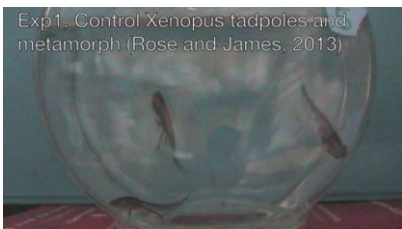

**Movie 3.** A second 10-second clip of untreated (control) tadpoles and metamorphs in Experiment 1 showing swimming and breathing behaviors.

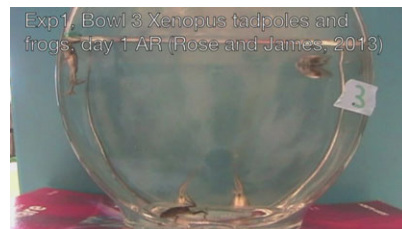

**Movie 7.** A second 10-second clip of tadpoles and frog in Experiment 1 Bowl 3 that have been air-restored (AR) for 1 day, showing swimming and breathing behaviors.

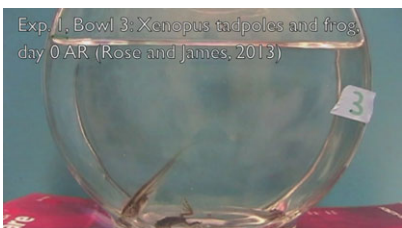

**Movie 4.** A 10-second clip of tadpoles and frog in Experiment 1 Bowl 3 that have been air-restored (AR) for 0 days, showing swimming and breathing behaviors.

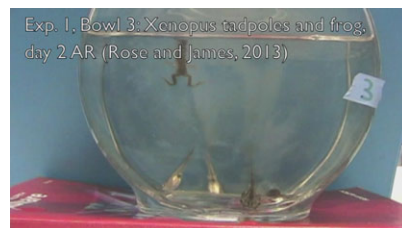

**Movie 8.** A 10-second clip of tadpoles and frog in Experiment 1 Bowl 3 that have been air-restored (AR) for 2 days, showing swimming and breathing behaviors.

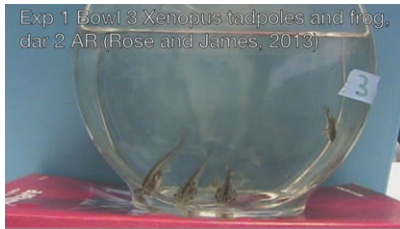

**Movie 9.** A second 10-second clip of tadpoles and frog in Experiment 1 Bowl 3 that have been air-restored (AR) for 2 days, showing swimming and breathing behaviors.

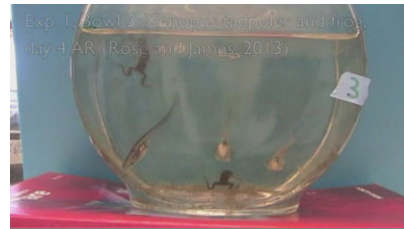

**Movie 12.** A 10-second clip of tadpoles and frog in Experiment 1 Bowl 3 that have been air-restored (AR) for 4 days, showing swimming and breathing behaviors.

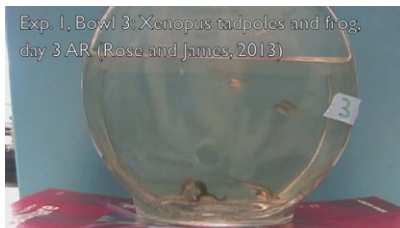

**Movie 10.** A 10-second clip of tadpoles and frog in Experiment 1 Bowl 3 that have been air-restored (AR) for 3 days, showing swimming and breathing behaviors.

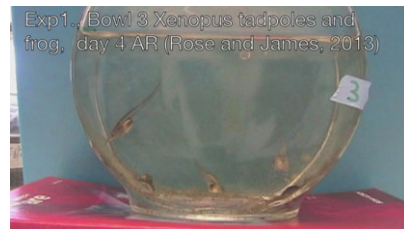

**Movie 13.** A second 10-second clip of tadpoles and frog in Experiment 1 Bowl 3 that have been air-restored (AR) for 4 days, showing swimming and breathing behaviors.

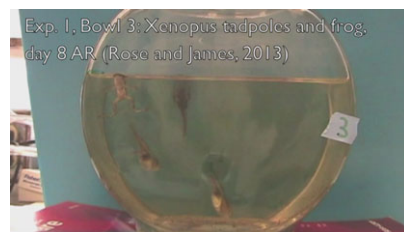

**Movie 14.** A 10-second clip of tadpoles and frog in Experiment 1 Bowl 3 that have been air-restored (AR) for 8 days, showing swimming and breathing behaviors.

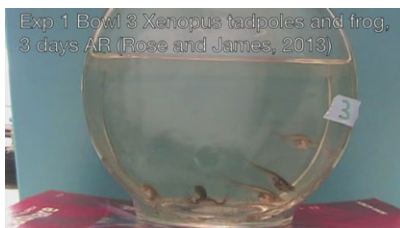

**Movie 11.** A second 10-second clip of tadpoles and frog in Experiment 1 Bowl 3 that have been air-restored (AR) for 3 days, showing swimming and breathing behaviors.

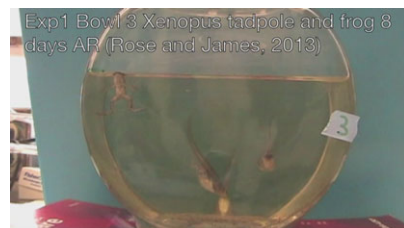

**Movie 15.** A second 10-second clip of tadpoles and frog in Experiment 1 Bowl 3 that have been air-restored (AR) for 8 days, showing swimming and breathing behaviors.

Table S1. Numbers, stages and/or ages of specimens used for description and scoring of lung development.

|                                                       | tadpoles                                                                                                                                                                                                                                                                                                                                                               | metamorphs    | frogs                                                | days reared after air restoration |
|-------------------------------------------------------|------------------------------------------------------------------------------------------------------------------------------------------------------------------------------------------------------------------------------------------------------------------------------------------------------------------------------------------------------------------------|---------------|------------------------------------------------------|-----------------------------------|
| Untreated specimens:                                  |                                                                                                                                                                                                                                                                                                                                                                        |               |                                                      |                                   |
| Dissected whole mounts                                | 33, NF 51–57                                                                                                                                                                                                                                                                                                                                                           |               | 26, NF 66 – 4 months post NF 66                      |                                   |
| Albino whole mounts (lungs observed through the skin) | 6, NF 46–58                                                                                                                                                                                                                                                                                                                                                            | 16, NF 60–65  | 18, NF 66 – 1 month post NF 66                       |                                   |
| Smooth muscle actin-stained whole mounts              | 6, NF 47–56                                                                                                                                                                                                                                                                                                                                                            | 3, NF 59–65   |                                                      |                                   |
| Sectioned specimens                                   | 73, NF 40–58                                                                                                                                                                                                                                                                                                                                                           | 10, NF 59–65  | 7, NF 66 – 6 months post NF 66, fully grown adult    |                                   |
|                                                       | (BrdU-treated specimens: 43 at NF 40–47 (11 d pf) and 16 at NF 49–66+; smooth muscle actin-stained specimens: 14 at NF 49–adult.)                                                                                                                                                                                                                                      |               |                                                      |                                   |
| Air-deprived specimens:                               |                                                                                                                                                                                                                                                                                                                                                                        |               |                                                      |                                   |
| Dissected whole mounts                                | 69, NF 49–57                                                                                                                                                                                                                                                                                                                                                           | 24, NF 61–65  | 14, NF 66 – 4 months post NF 66                      |                                   |
| Smooth muscle actin-stained whole mounts              | 3, NF 51–54                                                                                                                                                                                                                                                                                                                                                            |               |                                                      |                                   |
| Sectioned specimens                                   | 12 at NF 46 (5 days 5 hr pf)*, 9 at NF 49–51 (17 days pf), 4 at NF 56–57                                                                                                                                                                                                                                                                                               | 2, NF 64–64.5 | 2, NF 66, adult at 19 months                         |                                   |
|                                                       | (*4 NF 46 specimens were made AD at each of NF 41–44 (3 days 16 hours pf), NF 43–45 (4 days 4 hr pf) and NF 46 (4 days 14 hours pf); the first two ages were before the onset of breathing and the third one after. BrdU-treated specimens: 1 at NF 57; smooth muscle actin-stained specimens: 4 dissected whole mount specimens at NF 56, 57, 64 and 64.5 and adult.) |               |                                                      |                                   |
| Air-restored specimens:                               |                                                                                                                                                                                                                                                                                                                                                                        |               |                                                      |                                   |
| Dissected whole mounts                                | 17, NF 55–58                                                                                                                                                                                                                                                                                                                                                           | 5, NF 60–65   | 29, NF 66 – 3 months post NF 66                      | 1–56                              |
| Smooth muscle actin-stained whole mounts              | 3, NF 51–54.5                                                                                                                                                                                                                                                                                                                                                          | 5, NF 59–64.5 |                                                      | 3–9                               |
| Sectioned specimens                                   | 9, NF 55 and 57                                                                                                                                                                                                                                                                                                                                                        |               | 9, NF 66 – 4 months post NF 66, adult at 14.5 months | 1–30                              |
|                                                       | (BrdU-treated: all; smooth muscle actin-stained specimens: 2 dissected whole mounts with tissue-filled lungs at 4 months post NF 66 and adult.)                                                                                                                                                                                                                        |               |                                                      |                                   |
